# Supplementary material for: Implicit Value Updating Explains Transitive Inference Performance: The Betasort Model
Source: PubMed Central journal article supplement (PMC4583549; doi:10.1371/journal.pcbi.1004523), 2015-09-25
Supplement: pcbi.1004523.s001.pdf [file pcbi.1004523.s001.pdf]

# Implicit value updating explains transitive inference performance: The betasort model (Supplemental Information)

Greg Jensen<sup>1,2\*</sup>, Fabian Muñoz<sup>1</sup>, Yelda Alkan<sup>1</sup>, Vincent P. Ferrera<sup>1,3</sup>, Herb Terrace<sup>2</sup>

---

**Algorithm 1:** The betasort updating policy.

---

**Data:** memory arrays  $\mathbf{U}$ ,  $\mathbf{L}$ ,  $\mathbf{R}$ ,  $\mathbf{N}$ , chosen stimulus  $ch$ , unchosen stimulus  $nc$ , outcome  $r$ , recall  $\xi$

**Result:** updated model  $\mathbf{U}$ ,  $\mathbf{L}$ ,  $\mathbf{R}$ ,  $\mathbf{N}$

```

begin
   $\mathbf{R} \leftarrow \mathbf{R} \cdot \xi$ ;  $\mathbf{N} \leftarrow \mathbf{N} \cdot \xi$  /* Relax  $\mathbf{R}$  and  $\mathbf{N}$  */
   $\mathbf{E} \leftarrow \mathbf{R}/(\mathbf{R} + \mathbf{N})$  /* Estimate trial reward rates */
   $\xi_{\mathbf{R}} \leftarrow \mathbf{E}/(\mathbf{E} + 1) + 0.5$ 
   $\mathbf{U} \leftarrow \mathbf{U} \cdot \xi_{\mathbf{R}} \cdot \xi$ ;  $\mathbf{L} \leftarrow \mathbf{L} \cdot \xi_{\mathbf{R}} \cdot \xi$  /* Relax  $\mathbf{U}$  and  $\mathbf{L}$  */
   $\mathbf{V} \leftarrow \mathbf{U}/(\mathbf{U} + \mathbf{L})$  /* Estimate stimulus positions */
  if  $r = 1$  then
     $\mathbf{U} \leftarrow \mathbf{U} + \mathbf{V}$ ;  $\mathbf{L} \leftarrow \mathbf{L} + (1 - \mathbf{V})$  /* consolidate all stimuli */
  else
     $U_{nc} \leftarrow U_{nc} + 1$  /* shift  $nc$  up */
     $L_{ch} \leftarrow L_{ch} + 1$  /* shift  $ch$  down */
    for  $j = 1$  to 7 do
      if  $j \neq ch$  AND  $j \neq nc$  then
        if  $V_j > V_{ch}$  AND  $V_j < V_{nc}$  then
           $U_j \leftarrow U_j + V_j$ ;  $L_j \leftarrow L_j + (1 - V_j)$  /* consolidate  $j$  */
        else if  $V_j < V_{nc}$  then
           $L_j \leftarrow L_j + 1$  /* shift  $j$  down */
        else if  $V_j > V_{ch}$  then
           $U_j \leftarrow U_j + 1$  /* shift  $j$  up */
    return  $\mathbf{U}$ ,  $\mathbf{L}$ ,  $\mathbf{R}$ ,  $\mathbf{N}$ 

```

---

---

**Algorithm 2:** The betaQ updating policy.

---

**Data:** memory arrays  $\mathbf{U}$ ,  $\mathbf{L}$ ,  $\mathbf{R}$ ,  $\mathbf{N}$ , chosen stimulus  $ch$ , unchosen stimulus  $nc$ , outcome  $r$ , recall  $\xi$

**Result:** updated model  $\mathbf{U}$ ,  $\mathbf{L}$ ,  $\mathbf{R}$ ,  $\mathbf{N}$

```

begin
   $R_{ch} \leftarrow R_{ch} \cdot \xi$ ;  $R_{nc} \leftarrow R_{nc} \cdot \xi$            /* Relax  $R_{ch}$  and  $R_{nc}$  */
   $N_{ch} \leftarrow N_{ch} \cdot \xi$ ;  $N_{nc} \leftarrow N_{nc} \cdot \xi$        /* Relax  $N_{ch}$  and  $N_{nc}$  */
   $\mathbf{E} \leftarrow \mathbf{R}/(\mathbf{R} + \mathbf{N})$            /* Estimate trial reward rates */
   $\xi_{\mathbf{R}} \leftarrow \mathbf{E}/(\mathbf{E} + 1) + 0.5$ 
   $U_{ch} \leftarrow U_{ch} \cdot \xi_{\mathbf{R}_{ch}} \cdot \xi$ ;  $U_{nc} \leftarrow U_{nc} \cdot \xi_{\mathbf{R}_{nc}} \cdot \xi$  /* Relax  $U_{ch}$  and  $U_{nc}$  */
   $L_{ch} \leftarrow L_{ch} \cdot \xi_{\mathbf{R}_{ch}} \cdot \xi$ ;  $L_{nc} \leftarrow L_{nc} \cdot \xi_{\mathbf{R}_{nc}} \cdot \xi$  /* Relax  $L_{ch}$  and  $L_{nc}$  */
   $\mathbf{V} \leftarrow \mathbf{U}/(\mathbf{U} + \mathbf{L})$            /* Estimate stimulus positions */
  if  $r = 1$  then
     $U_{ch} \leftarrow U_{ch} + V_{ch}$ ;  $L_{ch} \leftarrow L_{ch} + (1 - V_{ch})$  /* consolidate  $ch$  */
     $U_{nc} \leftarrow U_{nc} + V_{nc}$ ;  $L_{nc} \leftarrow L_{nc} + (1 - V_{nc})$  /* consolidate  $nc$  */
  else
     $U_{nc} \leftarrow U_{nc} + 1$            /* shift  $nc$  up */
     $L_{ch} \leftarrow L_{ch} + 1$            /* shift  $ch$  down */
  return  $\mathbf{U}$ ,  $\mathbf{L}$ ,  $\mathbf{R}$ ,  $\mathbf{N}$ 

```

---



---

**Algorithm 3:** The Q-learning updating policy.

---

**Data:** memory array  $\mathbf{Q}$ , chosen stimulus  $ch$ , unchosen stimulus  $nc$ , outcome  $r$ , modifier  $\alpha$

**Result:** updated model  $\mathbf{Q}$

```

begin
  if  $r = 1$  then
     $Q_{ch} \leftarrow Q_{ch} + \alpha \cdot (1 - Q_{ch})$            /* shift  $ch$  up */
     $Q_{nc} \leftarrow Q_{nc} - \alpha \cdot Q_{nc}$            /* shift  $nc$  down */
  else if  $r = 0$  then
     $Q_{ch} \leftarrow Q_{ch} - \alpha \cdot Q_{ch}$            /* shift  $ch$  down */
     $Q_{nc} \leftarrow Q_{nc} + \alpha \cdot (1 - Q_{nc})$        /* shift  $nc$  up */
  return  $\mathbf{Q}$ 

```

---
